# Supplementary material for: Antibody Recognition of CD4-Induced Open HIV-1 Env Trimers
Source: PubMed Central journal article supplement (PMC9769388; doi:10.1128/jvi.01082-22), 2022-11-30
Supplement: jvi.01082-22-s0001.pdf [file jvi.01082-22-s0001.pdf]

**Supplemental Material**  
**Antibody recognition of CD4-induced open HIV-1 Env trimers**

Zhi Yang<sup>a</sup>, Kim-Marie A. Dam<sup>a</sup>, Jonathan M. Gershoni<sup>b</sup>, Susan Zolla-Pazner<sup>c</sup>, Pamela J. Bjorkman<sup>a#</sup>

<sup>a</sup>Division of Biology and Biological Engineering, California Institute of Technology, Pasadena, CA 91125, USA

<sup>b</sup>Shmunis School of Biomedicine and Cancer Research, Tel Aviv University, Israel

<sup>c</sup>Department of Medicine, Division of Infectious Diseases, Icahn School of Medicine at Mount Sinai, New York, NY, 10029 USA

Zhi Yang and Kim-Marie A. Dam contributed equally to this work. Author order was determined by the two co-first authors.

#Address correspondence to Pamela J. Bjorkman, [bjorkman@caltech.edu](mailto:bjorkman@caltech.edu)

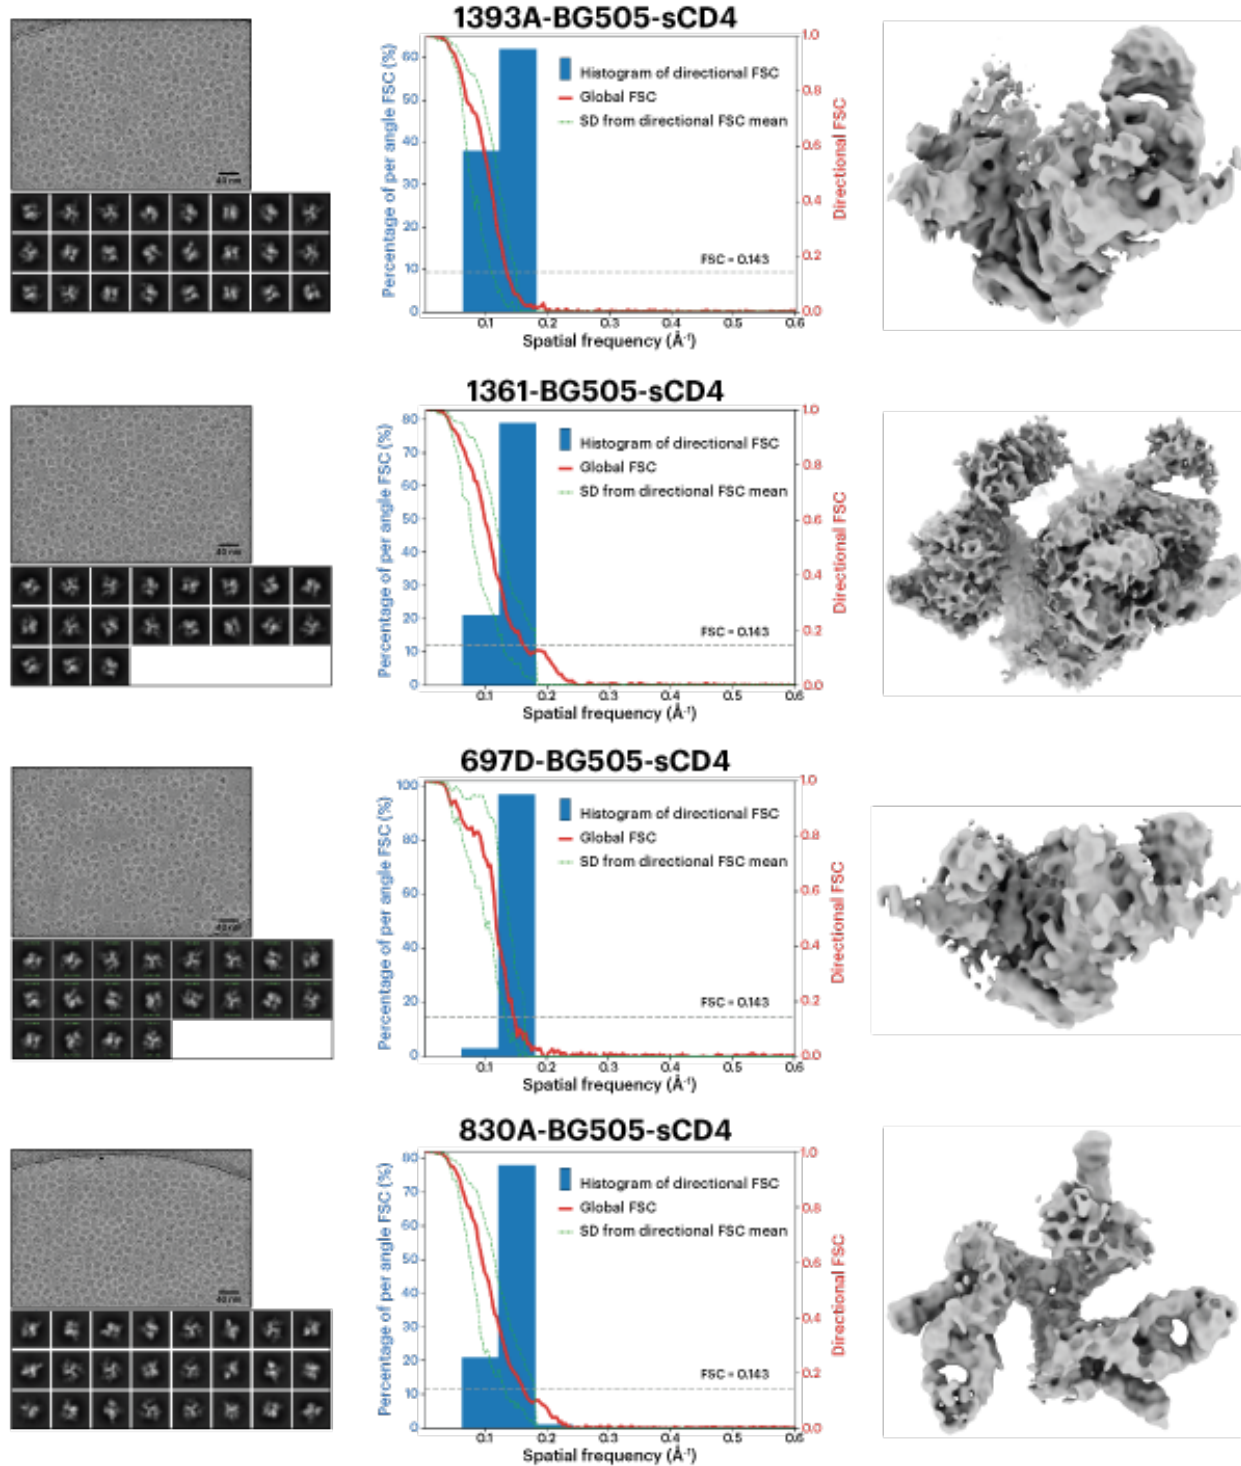

**Figure S1. Cryo-EM data processing and validation of V2i Fab-BG505-sCD4 complexes.** Left: Example micrographs and 2D class averages of V2i Fab-BG505-sCD4 complexes. Middle: Plots of global half-map FSCs (solid red line), directional resolution values  $\pm 1\sigma$  from the mean

(left axis, green dashed lines) and distributions sampled over the 3D FSC (blue histograms, right axis). Right: Cryo-EM density maps of V2i Fab-BG505-sCD4 complexes.

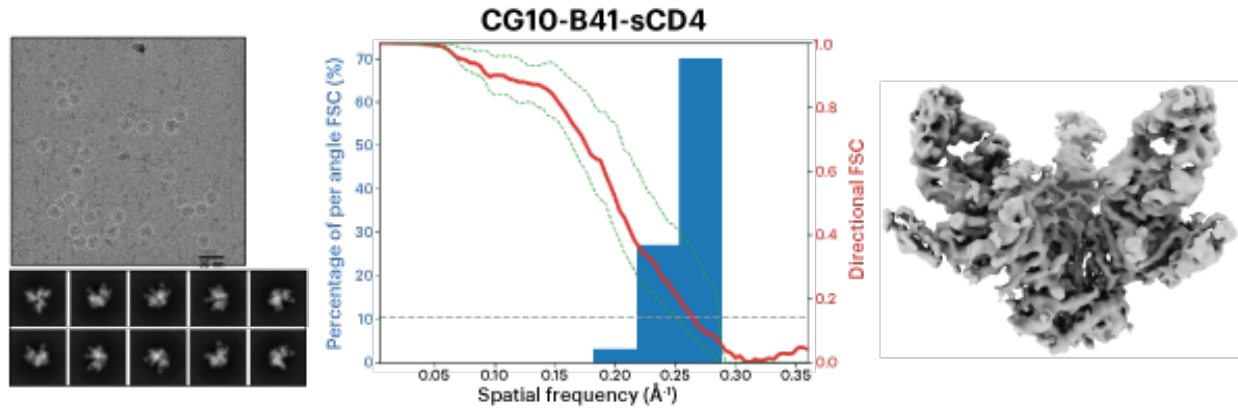

**Figure S2. Cryo-EM data processing and validation of CG10 Fab-B41-sCD4 complex.** Left: Example micrograph and 2D class averages of the CG10-B41-sCD4 complex. Middle: Plot of global half-map FSC (solid red line), directional resolution values  $\pm 1\sigma$  from the mean (left axis, green dashed lines) and distributions sampled over the 3D FSC (blue histograms, right axis). Right: Cryo-EM map of the CG10-B41-sCD4 complex.

**Supplementary Table 1. Cryo-EM data collection, refinement, and validation statistics**

|                                           | <b>1393A-BG505-<br/>sCD4<br/>(EMD-27209)</b> | <b>1361-BG505-<br/>sCD4<br/>(EMD-27210)</b> | <b>697D-BG505-<br/>sCD4<br/>(EMD-27211)</b> | <b>830A-BG505-<br/>sCD4<br/>(EMD-27212)</b> |
|-------------------------------------------|----------------------------------------------|---------------------------------------------|---------------------------------------------|---------------------------------------------|
| <b>Data collection and<br/>processing</b> |                                              |                                             |                                             |                                             |
| Magnification *                           | 105,000x                                     | 105,000x                                    | 105,000x                                    | 105,000x                                    |
| Voltage (kV)                              | 300                                          | 300                                         | 300                                         | 300                                         |
| Electron exposure (e-/Å <sup>2</sup> )    | 60                                           | 60                                          | 60                                          | 60                                          |
| Defocus range (µm)                        | 1.8-3.0                                      | 1.8-3.0                                     | 1.8-3.0                                     | 1.8-3.0                                     |
| Pixel size (Å)                            | 0.416                                        | 0.416                                       | 0.435                                       | 0.416                                       |
| Recording mode                            | Super resolution                             | Super resolution                            | Super resolution                            | Super resolution                            |
| Collected movies (no.)                    | 3,239                                        | 2,412                                       | 2,340                                       | 1,872                                       |
| Symmetry imposed                          | C1                                           | C1                                          | C1                                          | C1                                          |
| Initial particle images (no.)             | 943,748                                      | 843,403                                     | 367,952                                     | 436,527                                     |
| Final particle images (no.)               | 107,234                                      | 104,002                                     | 21,655                                      | 16,575                                      |
| Overall map resolution (Å)                | 7.5                                          | 6.1                                         | 7.0                                         | 7.3                                         |

\* Nominal magnification

**Supplementary Table 2. X-ray data collection and refinement statistics**

| <b>CG10 Fab (PDB 8D54)</b>                              |                                               |
|---------------------------------------------------------|-----------------------------------------------|
| <b>Data collection</b>                                  |                                               |
| Space group                                             | P2 <sub>1</sub> 2 <sub>1</sub> 2 <sub>1</sub> |
| Cell dimensions                                         |                                               |
| <i>a</i> , <i>b</i> , <i>c</i> (Å)                      | 75.14, 77.80, 84.03                           |
| $\alpha$ , $\beta$ , $\gamma$ (°)                       | 90, 90, 90                                    |
| Resolution (Å)                                          | 38.90 - 1.40 (1.42 - 1.40) *                  |
| <i>R</i> <sub>merge</sub> (%)                           | 6.5 (151.3)                                   |
| <i>R</i> <sub>pim</sub> (%)                             | 1.8 (43.3)                                    |
| CC <sub>1/2</sub> (%)                                   | 99.9 (63.2)                                   |
| <i>I</i> / $\sigma$ <i>I</i>                            | 19.6 (1.7)                                    |
| Completeness (%)                                        | 99.5 (97.1)                                   |
| Multiplicity                                            | 13.3 (12.5)                                   |
| <b>Refinement</b>                                       |                                               |
| Resolution (Å)                                          | 1.40                                          |
| No. reflections                                         | 97,069 (4,660)                                |
| <i>R</i> <sub>free</sub> / <i>R</i> <sub>work</sub> (%) | 18.8 / 16.9                                   |
| No. atoms                                               |                                               |
| Protein                                                 | 3,330                                         |
| Ligand/ion                                              | 0                                             |
| Water                                                   | 680                                           |
| R.m.s. deviations                                       |                                               |
| Bond lengths (Å)                                        | 0.008                                         |
| Bond angles (°)                                         | 0.86                                          |
| Rotamer outliers (%)                                    | 0.81                                          |
| Ramachandran plot                                       |                                               |
| Favored (%)                                             | 98.2                                          |
| Allowed (%)                                             | 1.8                                           |
| Disallowed                                              | 0                                             |
| Average <i>B</i> -factor (Å <sup>2</sup> )              | 18.9                                          |

\*Values in parentheses are for highest-resolution shell.

**Supplementary Table 3. Cryo-EM data collection, refinement, and validation statistics**

|                                                    | <b>CG10-B41-sCD4<br/>(PDB 8D5C)<br/>(EMD-27208)</b> |
|----------------------------------------------------|-----------------------------------------------------|
| <b>Data collection and processing</b>              |                                                     |
| Magnification *                                    | 105,000x                                            |
| Voltage (kV)                                       | 300                                                 |
| Electron exposure (e-/Å <sup>2</sup> )             | 60                                                  |
| Defocus range (µm)                                 | 1.8-3.0                                             |
| Pixel size (Å)                                     | 1.11                                                |
| Recording mode                                     | Counting                                            |
| Collected movies (no.)                             | 3,528                                               |
| Symmetry imposed                                   | C1                                                  |
| Initial particle images (no.)                      | 933,854                                             |
| Final particle images (no.)                        | 134,746                                             |
| Overall map resolution (Å) **<br>(masked/unmasked) | 4.1 (4.2)                                           |
| <b>Refinement</b>                                  |                                                     |
| Initial models used (PDB code)                     | 8D54 (this study), 5VN3 ***                         |
| Map and model CC                                   | 0.66                                                |
| Map sharpening <i>B</i> factor (Å <sup>2</sup> )   | 109.7                                               |
| Model composition                                  |                                                     |
| Protein residues                                   | 2,730                                               |
| Validation                                         |                                                     |
| MolProbity score                                   | 2.43                                                |
| Clashscore                                         | 31.6                                                |
| Poor rotamers (%)                                  | 0                                                   |
| Ramachandran plot                                  |                                                     |
| Favored (%)                                        | 93.0                                                |
| Allowed (%)                                        | 7.0                                                 |
| Disallowed (%)                                     | 0                                                   |
| RMS deviations                                     |                                                     |
| Length (Å)                                         | 0.002                                               |
| Angles (°)                                         | 0.48                                                |

\* Nominal magnification; \*\* FSC threshold 0.143; \*\*\* Partial structure composed of trimeric gp120/gp41 and sCD4
